# Supplementary material for: Regional- and season-specific exposure to lead in a common North American songbird
Source: Research Square preprint supplement (doi:10.21203/rs.3.rs-7013823/v1), 2025-08-25
Supplement: Supplementary file 1 [file 2c4c01852d4d75c62f675ce2.docx]

Figure S1. Relationship between Pb concentrations in 17 paired whole blood and RBC samples used to adjust our larger sample of RBC-derived American Robin blood Pb data. The darker band and line show the 95% confidence interval and fitted values for our GLM, whereas the lighter band and line show predictions from this model extended to the full range of our RBC-derived blood Pb data. The dashed line shows the 1:1 relationship between blood Pb concentrations.


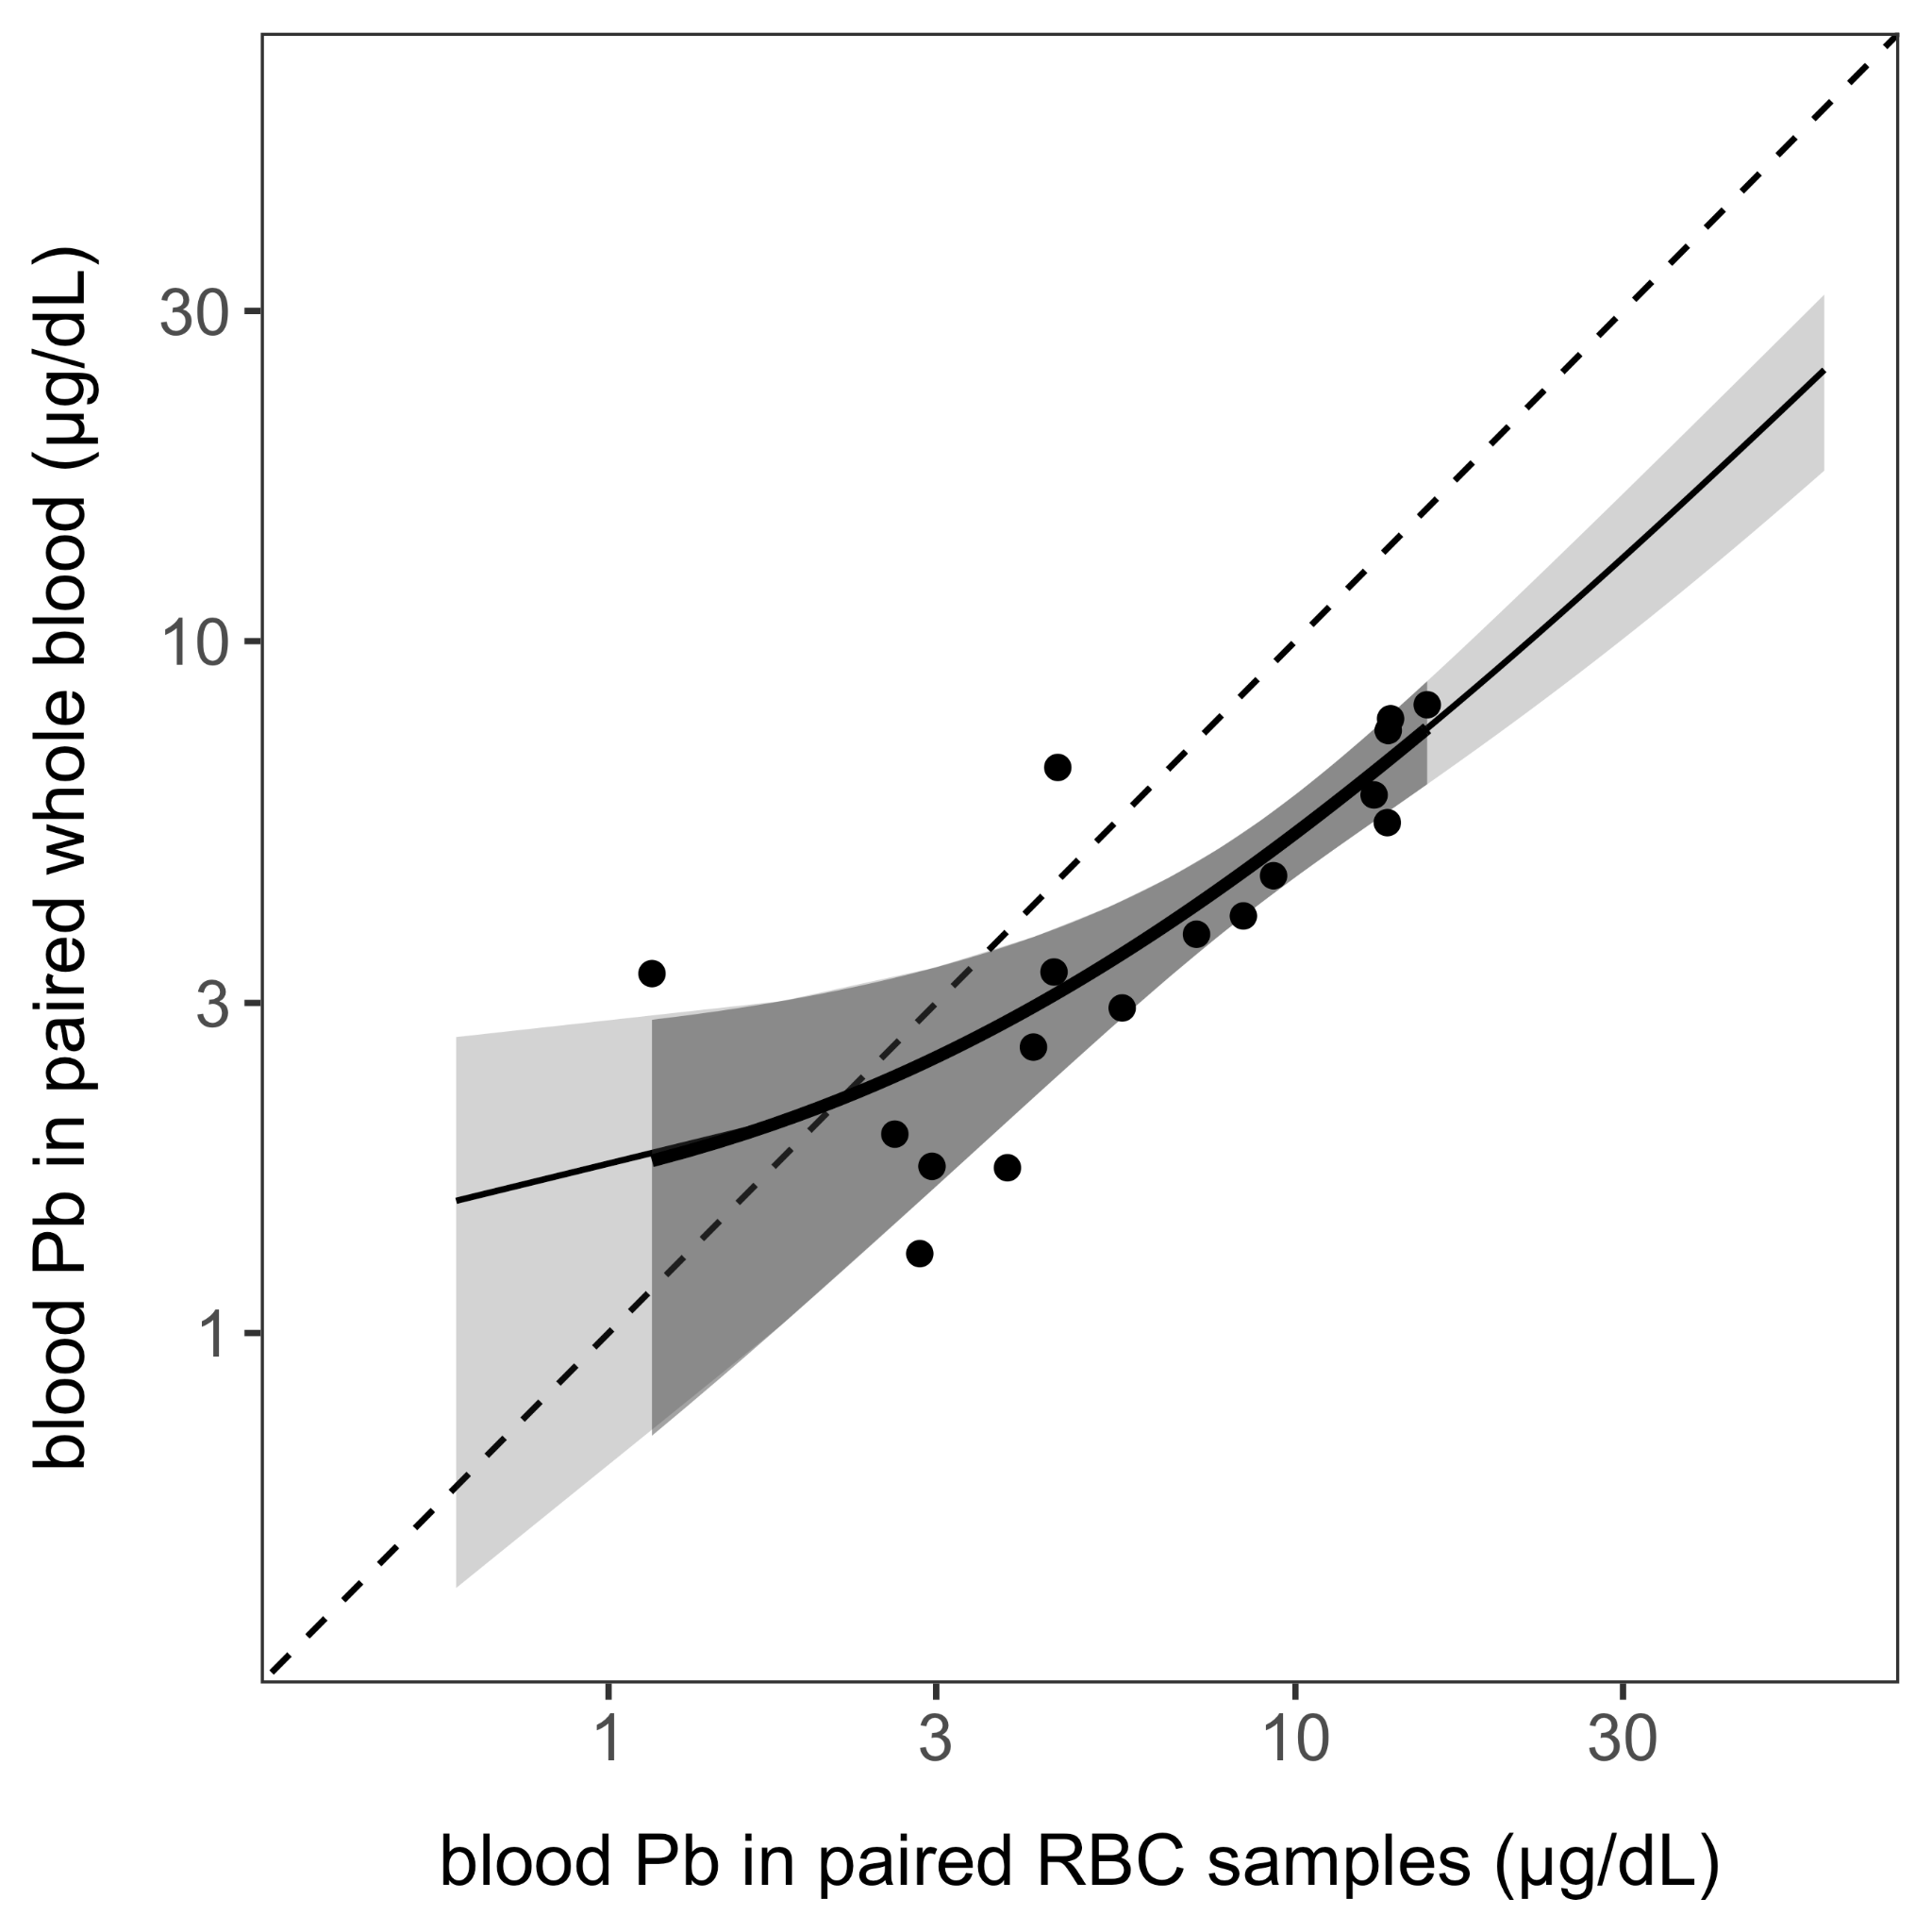


Table S1. GLM results from the analysis of demographic factors predicting log10-transformed American Robin blood Pb concentration in our whole dataset (*n* = 245).

| **Coefficient** | **β** | **SE** | ***t*** | ***p*** |
| --- | --- | --- | --- | --- |
| Intercept | 0.77 | 0.08 | 9.61 | < 0.001 |
| Male | -0.11 | 0.06 | -1.75 | 0.08 |
| Unknown sex | -0.11 | 0.06 | -1.85 | 0.06 |
| AHY | -0.15 | 0.06 | -2.61 | < 0.01 |
| Unknown age | -0.09 | 0.13 | -0.75 | 0.45 |

Table S2. GLM results from the analysis of geographic factors predicting log10-transformed American Robin blood Pb concentration in our spring data subset (*n* = 162).

| **Coefficient** | **β** | **SE** | ***t*** | ***p*** |
| --- | --- | --- | --- | --- |
| Intercept | 0.54 | 0.05 | 10.21 | < 0.001 |
| Indiana | 0.13 | 0.04 | 3.42 | < 0.001 |
| Male | -0.10 | 0.05 | -1.95 | 0.05 |
| Unknown sex | -0.15 | 0.06 | -2.74 | < 0.01 |

Table S3. GAM results from the season-focused analysis of log10-transformed American Robin blood Pb concentration within our Indiana subset of the data (*n* = 194). The table reports the parametric results.

| **Coefficient** | **β** | **SE** | ***t*** | ***p*** |
| --- | --- | --- | --- | --- |
| Intercept | 0.72 | 0.10 | 7.08 | < 0.001 |
| 2022 | 0.03 | 0.06 | 0.45 | 0.66 |
| 2023 | 0.01 | 0.07 | 0.19 | 0.85 |
| Male | -0.07 | 0.08 | -0.83 | 0.41 |
| Unknown sex | -0.08 | 0.09 | -0.98 | 0.33 |
| AHY | -0.12 | 0.06 | -1.87 | 0.06 |
| Unknown age | -0.03 | 0.13 | -0.20 | 0.84 |

Table S4. GLM results from American Robin blood Pb concentration predicting body condition (*n* = 216).

| **Coefficient** | **β** | **SE** | ***t*** | ***p*** |
| --- | --- | --- | --- | --- |
| Intercept | -0.10 | 1.85 | -0.05 | 0.96 |
| log10 Pb | -0.91 | 1.17 | -0.78 | 0.44 |
| Male | -0.08 | 1.37 | -0.06 | 0.95 |
| Unknown sex | -0.04 | 1.35 | -0.03 | 0.98 |
| AHY | 0.64 | 1.04 | 0.61 | 0.54 |
| Unknown age | 3.55 | 2.39 | 1.49 | 0.14 |
